# Supplementary material for: Glimpses of the co-operative movement in the Philippines.
Source: Royal Society of Chemistry journal article supplement (doi:10.1039/b810426c), 1980-01-01
Supplement: b810426c.pdf [file b810426c.pdf]

## **Electronic Supplementary Information**

# **Spontaneous formation of chiral supramolecular superhelix in the crystalline state using single-stranded tetranuclear metallohelicate**

Shigehisa Akine, Takashi Matsumoto and Tatsuya Nabeshima \*

Graduate School of Pure and Applied Sciences, University of Tsukuba  
Tsukuba Ibaraki 305-8571, Japan.

Fax: +81-29-853-4507; Tel: +81-29-853-4507

E-mail: nabesima@chem.tsukuba.ac.jp

### Synthesis of ligand $H_6L^2$ .

A solution of (*R,R*)-1,2-diphenylethylenediamine (31.8 mg, 0.15 mmol) in chloroform/ethanol (1:1, 10 mL) was added dropwise to a solution of aldehyde **1**<sup>[1]</sup> (112.2 mg, 0.30 mmol) in chloroform/ethanol (1:1, 10 mL) at 60 °C and the solution was heated for 2 h at the temperature. After the removal of the solvent, the crude product was purified by HPLC (GPC,  $CHCl_3$ ) to afford yellow crystals of  $H_6L^2$  (101 mg, 72%); mp 105-106 °C,  $^1H$  NMR (400 MHz,  $CDCl_3$ )  $\delta$  3.90 (s, 6H), 4.46-4.51 (m, 8H), 4.73 (s, 2H), 6.65 (d,  $J = 8.1$  Hz, 2H), 6.73 (d,  $J = 8.1$  Hz, 2H), 6.80-6.85 (m, 4H), 6.90 (dd,  $J = 6.9, 2.6$  Hz, 2H), 7.14-7.21 (m, 10H), 8.19 (s, 2H), 8.25 (s, 2H), 8.33 (s, 2H), 9.45 (s, 2H), 9.71 (s, 2H), 13.58 (s, 2H).  $^{13}C$  NMR (100 MHz,  $CDCl_3$ )  $\delta$  56.22, 73.10, 73.21, 80.24, 113.60, 116.49, 118.29, 119.02, 119.47 ( $\times 2$ ), 121.93, 122.46, 127.81, 127.89, 128.46, 138.77, 145.89, 147.15, 148.19, 150.16, 151.32, 152.01, 165.79. Anal. Calcd for  $C_{50}H_{48}N_6O_{12}$ : C, 64.93; H, 5.23; N, 9.09. Found: C, 64.81; H, 5.26; N, 9.09.

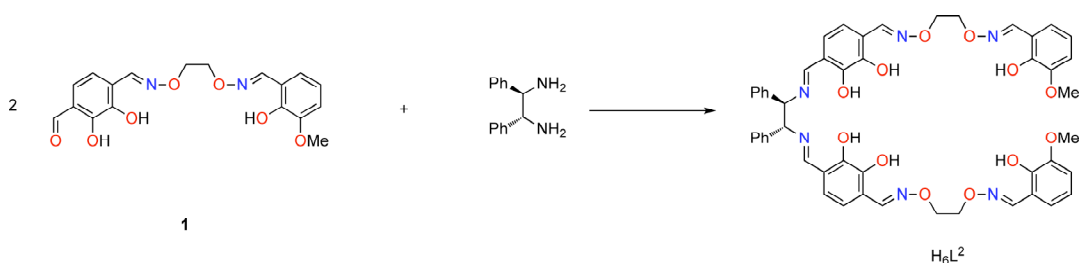

### Synthesis of $[L^2Zn_3La(OAc)_3]$ .

A solution of zinc(II) acetate dihydrate (3.29 mg, 0.015 mmol) and lanthanum(III) acetate sesquihydrate (1.72 mg, 0.005 mmol) in methanol/water (9:1) was added to a solution of  $H_6L^2$  (4.63 mg, 0.005 mmol) in chloroform. After the removal of the solvent, the residue was recrystallized from chloroform/methanol to give yellow crystals of  $[L^2Zn_3La(OAc)_3]$  (7.1 mg, 87%). Anal. Calcd for  $C_{56}H_{51}LaN_6O_{18}Zn_3 \cdot H_2O \cdot 2MeOH \cdot CHCl_3$ : C, 43.40; H, 3.83; N, 5.15. Found: C, 43.57; H, 3.88; N, 5.06.

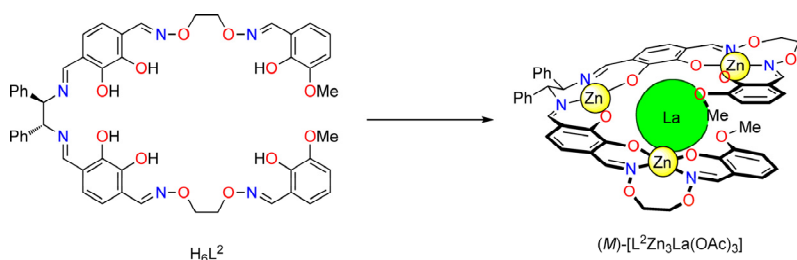

### **References**

- [1] Akine, S.; Taniguchi, T.; Saiki, T.; Nabeshima, T. *J. Am. Chem. Soc.* **2005**, *127*, 540-541.
